# Supplementary figures and images for: Association between Consumption of Ultra-Processed Food and Body Composition of Adults in a Capital City of a Brazilian Region
Source: MDPI journal article supplement (doi:10.3390/nu15143157), 2023-07-15

## Directed Acyclic Graph (DAG)

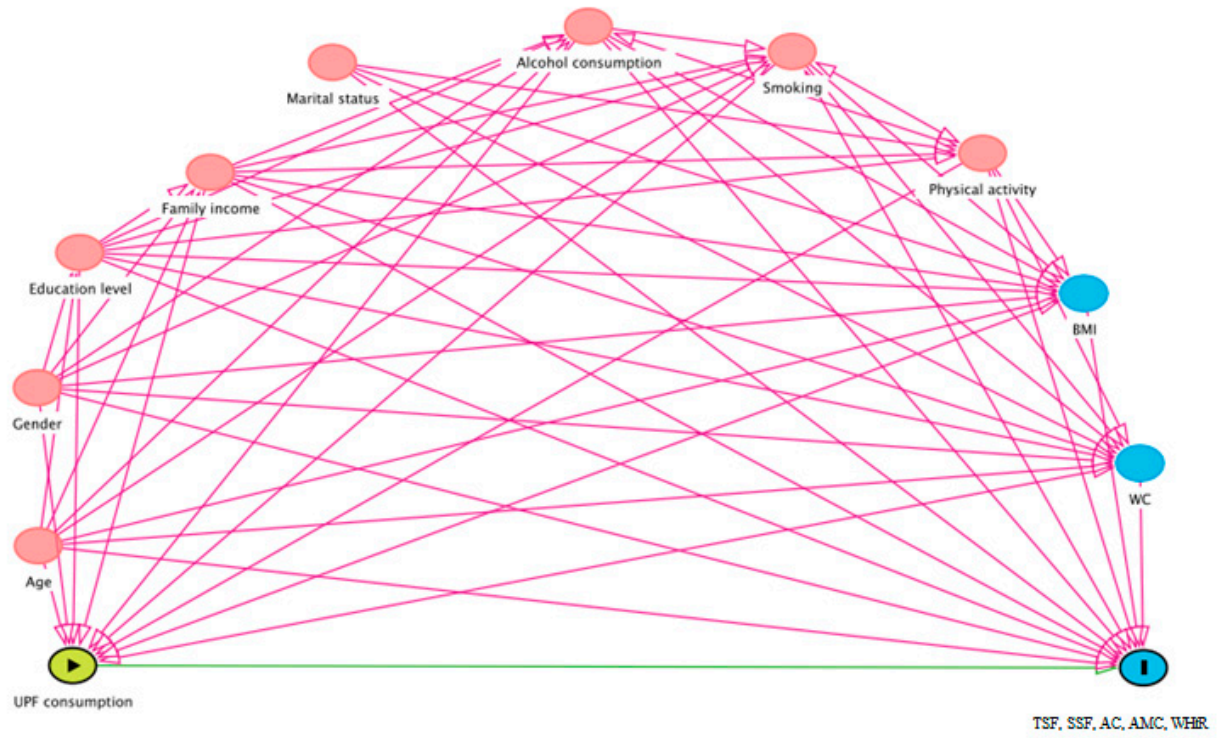

Supplement: s1 [file s1]
